# Supplementary material
Source: ML conference proceedings conference paper supplement (https://openreview.net/forum?id=1EzYKcIZXi)
Supplement: supplementary_material [file README.docx]

**All the code is implemented in Python, and our PyTorch version is 2.2.1.**

utils.py provides some commonly used functions. LDLCC.py includes the code for our proposed LDLCC and the corresponding experimental code. LDLCC-1.py and LDLCC-2.py include the code for LDLCC’s two variants and the corresponding experimental code.

**Running LDLCC.py directly can produce the experimental results. Note that before running, the dataset folder “datasets” and the code should be in the same path, and the output of LDLCC.py will be in console.**
